# Supplementary material for: Human IgMhiCD300a+ B Cells Are Circulating Marginal Zone Memory B Cells That Respond to Pneumococcal Polysaccharides and Their Frequency Is Decreased in People Living with HIV
Source: MDPI journal article supplement (doi:10.3390/ijms241813754), 2023-09-06
Supplement: s1 [file s1]

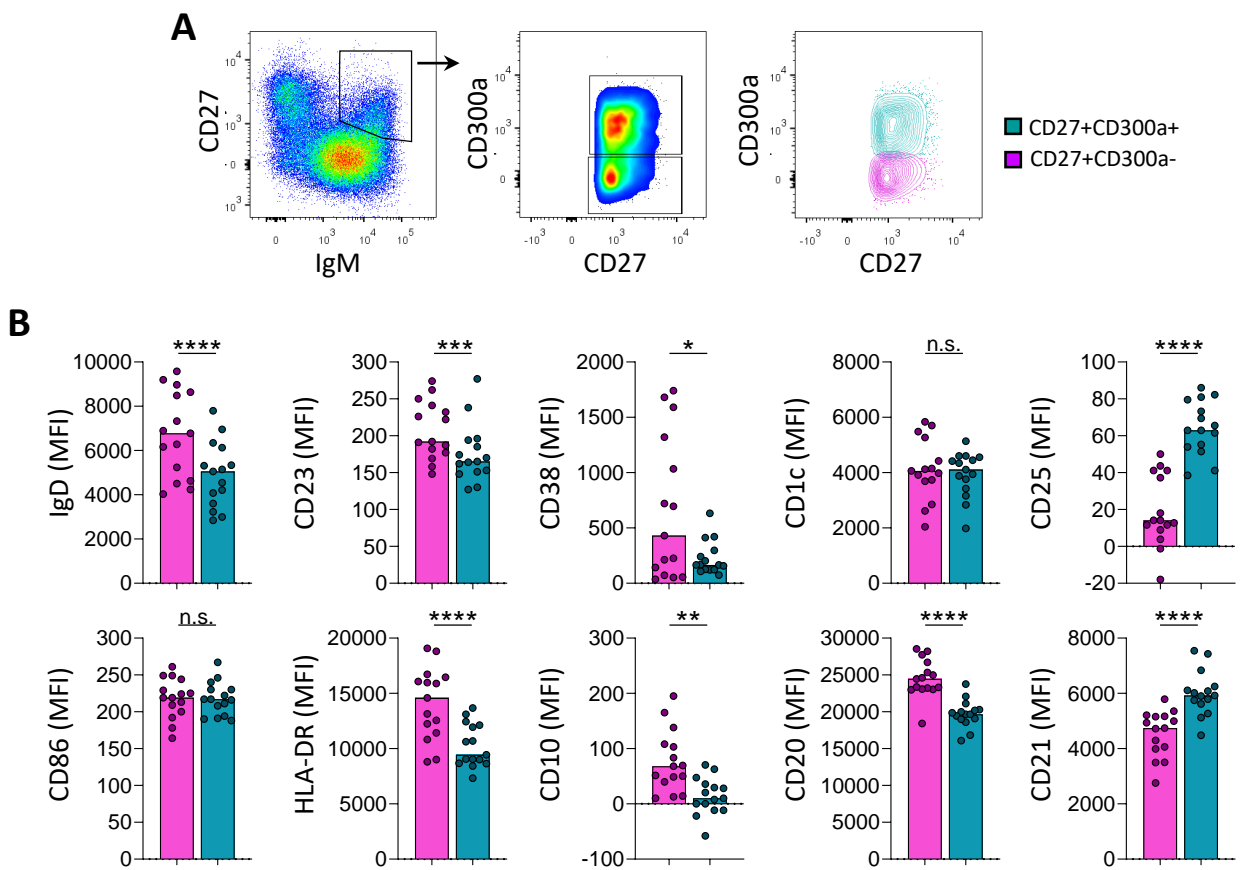

**Supplementary Figure S1. Phenotypical characterization of  $\text{IgM}^{\text{hi}}\text{CD27}^+\text{300a}^+$  and  $\text{IgM}^{\text{hi}}\text{CD27}^+\text{300a}^-$ .** (A) Pseudocolor plots of concatenated peripheral  $\text{CD19}^+$  B cells from healthy donors in which  $\text{IgM}^{\text{hi}}\text{CD27}^+$  were analyzed based on CD300a expression.  $\text{CD300a}^+$  (green) and  $\text{CD300a}^-$  (pink) B cell subsets are distinguished. (B) Dot-bar graphs showing the median fluorescence intensity (MFI) of IgD, CD23, CD38, CD1c, CD25, CD86, HLA-DR, CD10, CD20 and CD21 in the indicated  $\text{IgM}^{\text{hi}}\text{CD27}^+$  B cell subsets. Each dot represents a donor. Statistical significance was determined using t-test or Wilcoxon matched-pairs signed rank test. \* $p < 0.05$ , \*\* $p < 0.01$ , \*\*\* $p < 0.001$ , \*\*\*\* $p < 0.0001$ , ns: not significant.

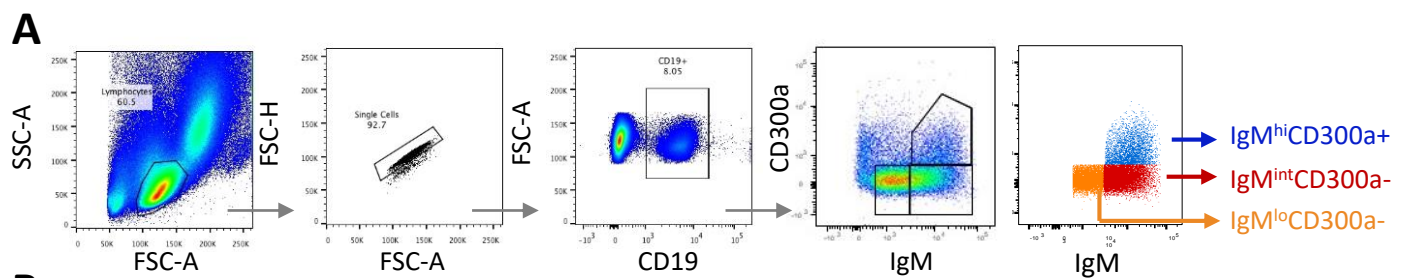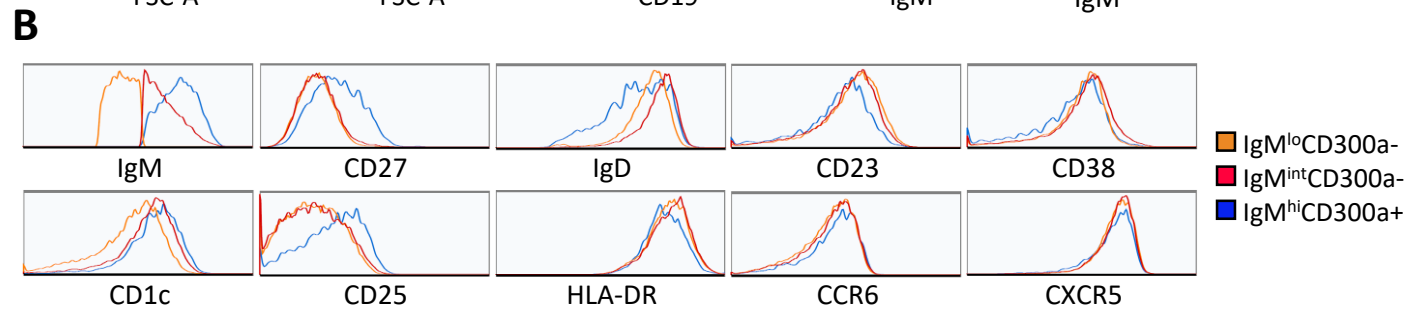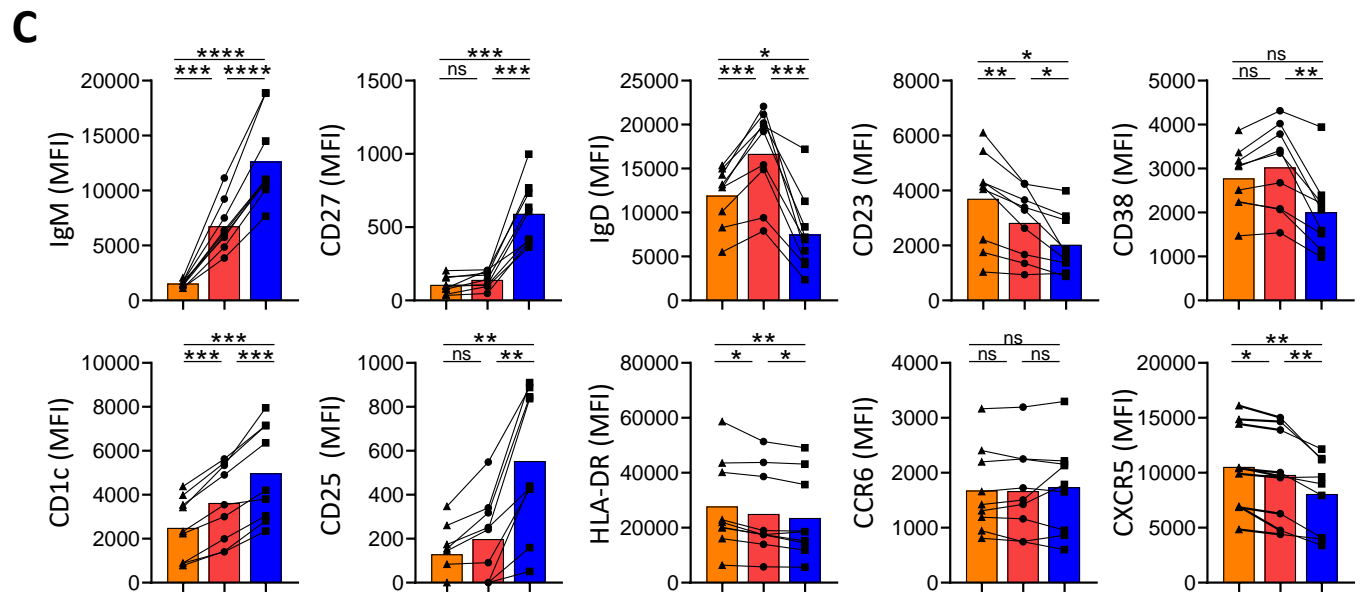

**Supplementary Figure S2. Phenotypical characterization of IgM<sup>hi</sup>CD300a<sup>+</sup>, IgM<sup>int</sup>CD300a<sup>-</sup> and IgM<sup>lo</sup>CD300a<sup>-</sup> B cells from peripheral blood of healthy donors.** (A) Pseudocolor plots of concatenated peripheral CD19<sup>+</sup> B cells from healthy donors in which IgM<sup>lo</sup>CD300a<sup>-</sup> (orange), IgM<sup>int</sup>CD300a<sup>-</sup> (red) and IgM<sup>hi</sup>CD300a<sup>+</sup> (blue) B cell subsets are distinguished. (B) Histograms showing expression of IgM, CD27, IgD, CD23, CD38, CD1c, CD25, HLA-DR, CCR6 and CXCR5 in each B cell subset. (C) Dot-bar graphs showing the median fluorescence intensity (MFI) of IgM, CD27, IgD, CD23, CD38, CD1c, CD25, HLA-DR, CCR6 and CXCR5 in the indicated B cell subsets (n = 9). Each dot represents a donor. Means ± SEMs are shown. Statistical significance was determined by the Friedman test. \*p < 0.05, \*\*p < 0.01, \*\*\*p < 0.001, \*\*\*\*p < 0.0001, ns: not significant.

**A**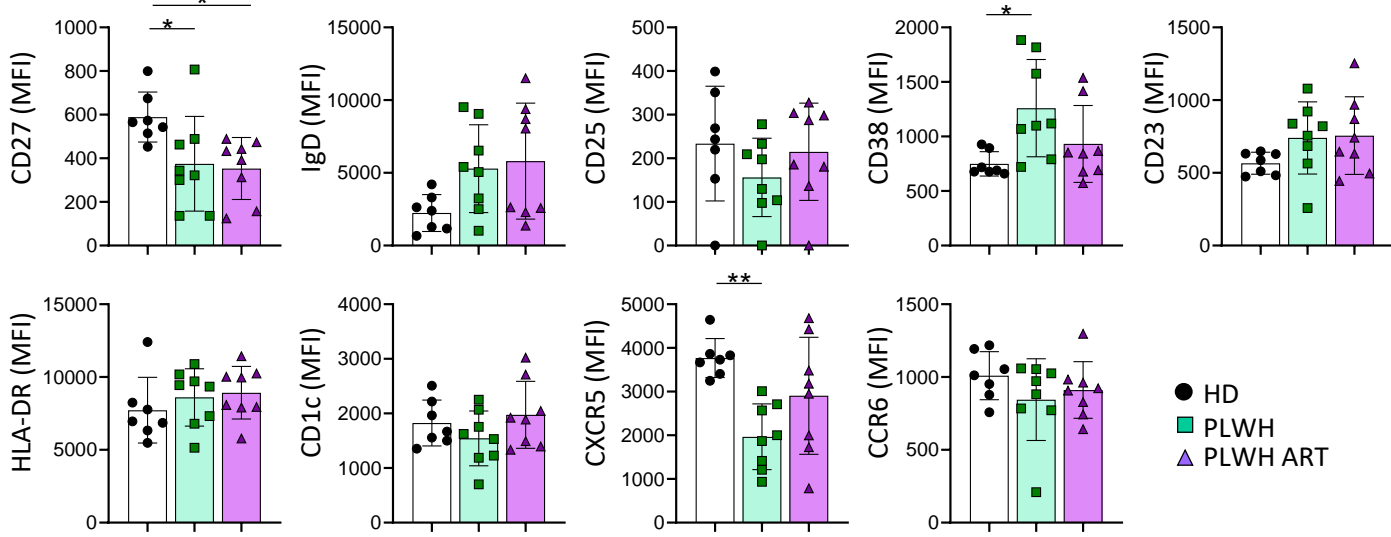**B**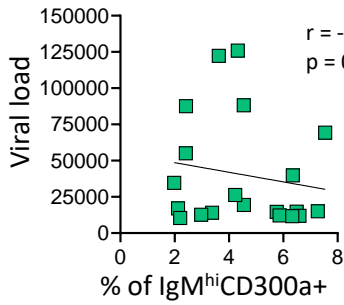**C**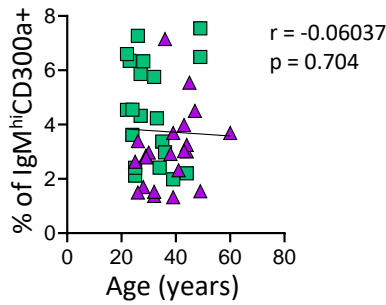**D**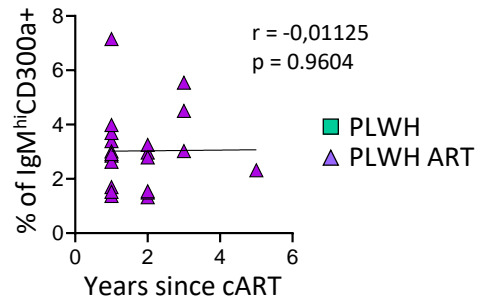

**Supplementary Figure S3.** (A) Dot-bar graphs showing the median fluorescence intensity (MFI) of CD27, IgD, CD25, CD38, CD23, HLA-DR, CD1c, CXCR5 and CCR6 in  $\text{IgM}^{\text{hi}}\text{CD300a}^+$  B cells from healthy donors (HD, white) ART naïve PLWH (PLWH, green) and PLWH under ART (PLWH ART, purple). Graphs showing the correlation of percentage of  $\text{IgM}^{\text{hi}}\text{CD300a}^+$  to the months viral load (B), age in years (C) and years since ART (D) in ART naïve PLWH (PLWH, green squares) and PLWH under ART (PLWH ART, purple triangles). Kruskal-Wallis test (A) and Spearman (B, D) and Pearson (C) correlation tests were used.
